# Supplementary material for: Naturally-Derived Amphiphilic Polystyrenes Prepared by Aqueous Controlled/Living Cationic Polymerization and Copolymerization of Vinylguaiacol with R–OH/BF3·OEt2
Source: MDPI journal article supplement (doi:10.3390/polym10121404), 2018-12-18
Supplement: s1 [file s1]

## *Supporting Information*

### **Naturally-Derived Amphiphilic Polystyrenes Prepared by Aqueous Controlled/Living Cationic Polymerization and Copolymerization of Vinylguaiacol with R–OH/BF<sub>3</sub>·OEt<sub>2</sub>**

Hisaaki Takeshima, Kotaro Satoh\* and Masami Kamigaito\*

Department of Molecular and Macromolecular Chemistry, Graduate School of Engineering,  
Nagoya University, Furo-cho, Chikusa-ku, Nagoya 464-8603, Japan

E-mail: satoh@chembio.nagoya-u.ac.jp, kamigait@chembio.nagoya-u.ac.jp

#### **Contents:**

|                        |    |
|------------------------|----|
| <b>Figure S1</b> ..... | S2 |
| <b>Figure S2</b> ..... | S3 |

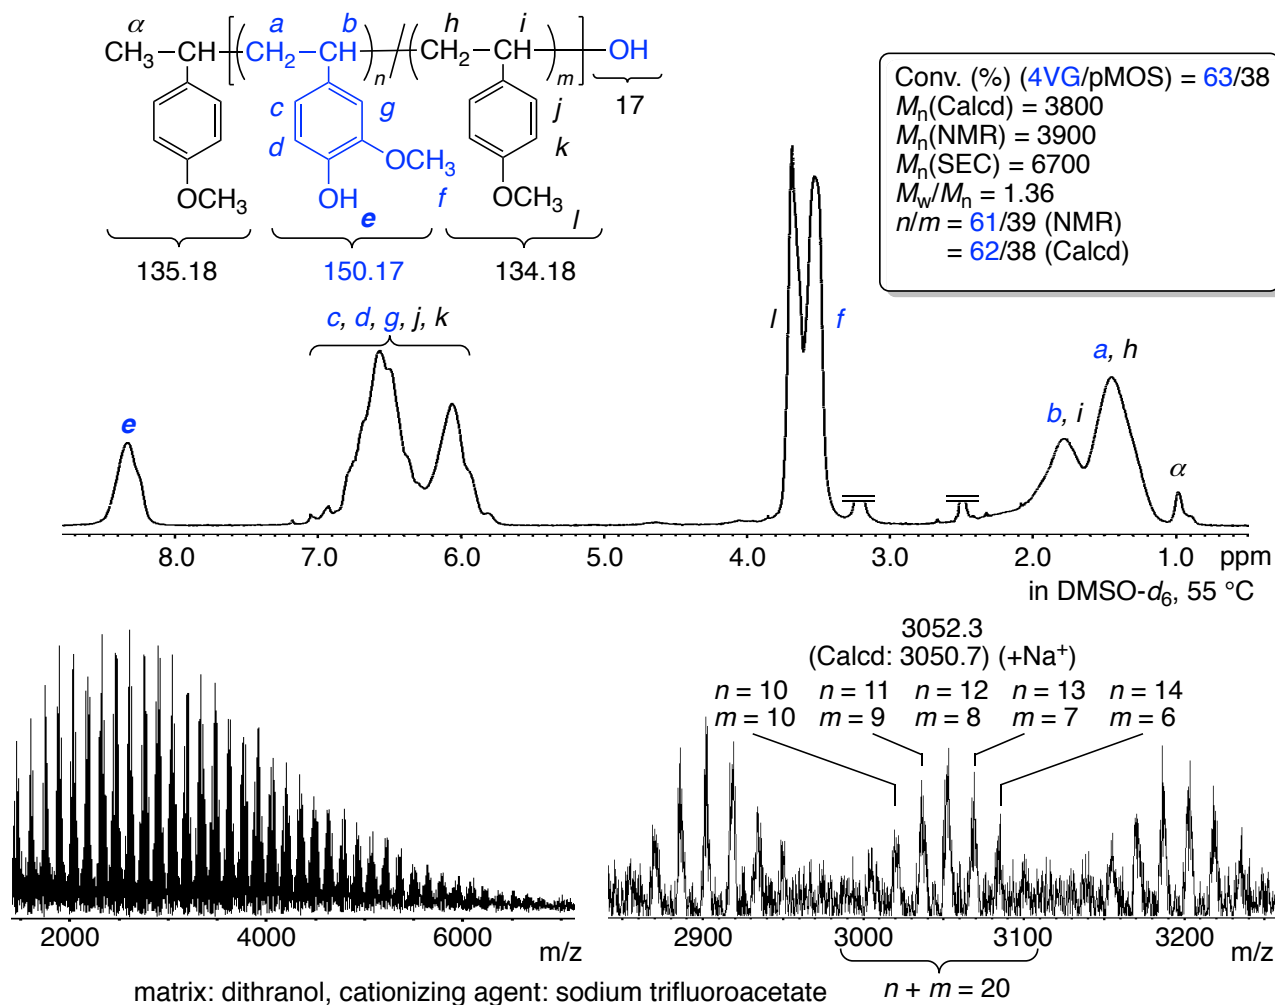

**Figure S1.** <sup>1</sup>H NMR and MALDI-TOF-MS spectra of the statistical random copolymer of 4VG and pMOS obtained with 1/BF<sub>3</sub>·OEt<sub>2</sub> (the same experiments as for Figure 4 in the main text): [4VG]<sub>0</sub>/[pMOS]<sub>0</sub>/[1]<sub>0</sub>/[BF<sub>3</sub>·OEt<sub>2</sub>]<sub>0</sub>/[H<sub>2</sub>O]<sub>0</sub> = 100/100/4.0/2.0/200 mM in CH<sub>3</sub>CN/CH<sub>2</sub>Cl<sub>2</sub> (8/2) at 0 °C.

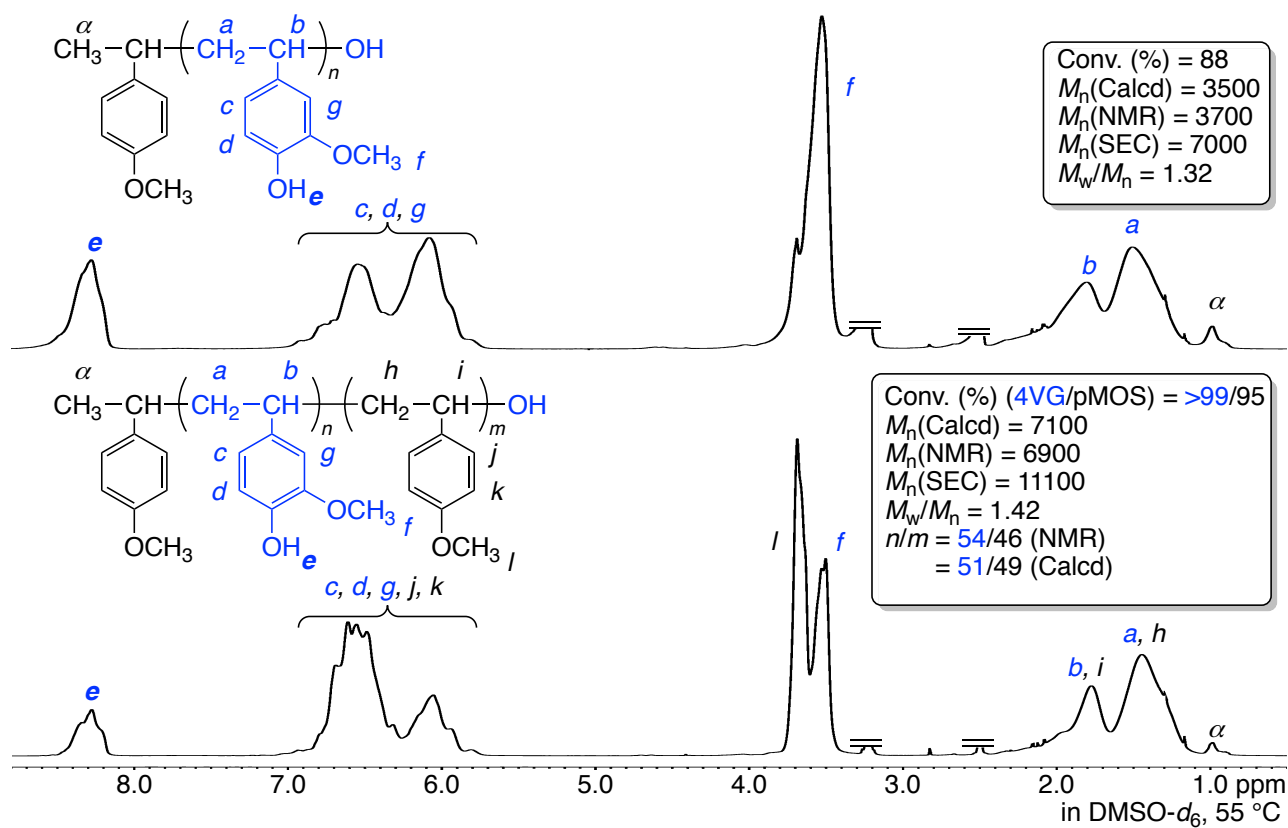

**Figure S2.**  $^1\text{H}$  NMR spectra of poly(4VG) and 4VG-*b*-pMOS block copolymer obtained with  $\mathbf{1}/\text{BF}_3\cdot\text{OEt}_2$  (the same experiments as for Figure 5 in the main text):  $[\mathbf{4VG}]_0/[\text{pMOS}]_{\text{add}}/[\mathbf{1}]_0/[\text{BF}_3\cdot\text{OEt}_2]_0/[\text{H}_2\text{O}]_0 = 100/100/4.0/2.0/200$  mM in  $\text{CH}_3\text{CN}/\text{CH}_2\text{Cl}_2$  (8/2) at 0 °C.
